# Supplementary material for: The RNA helicase, eIF4A‐1, is required for ovule development and cell size homeostasis in Arabidopsis
Source: PubMed Central journal article supplement (PMC4737287; doi:10.1111/tpj.13062), 2015-12-07

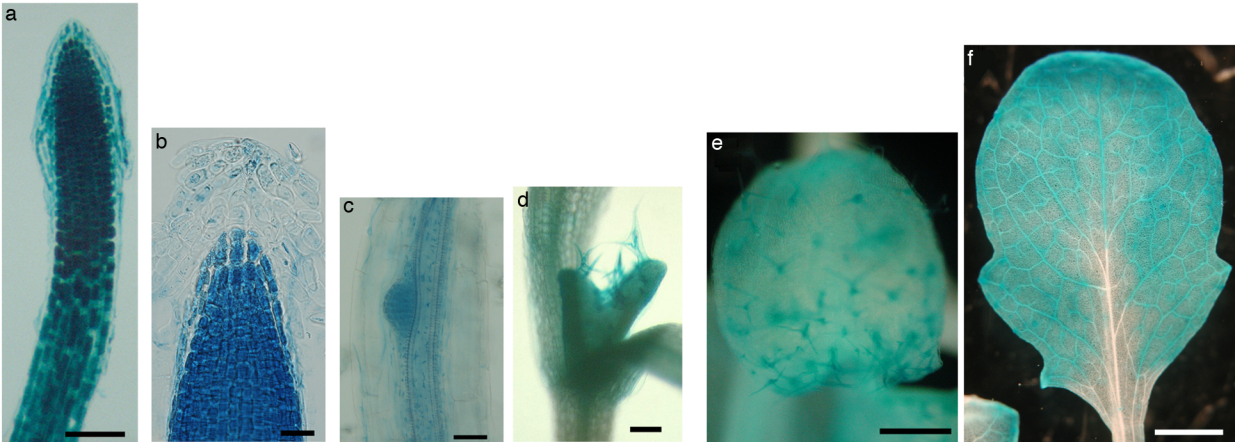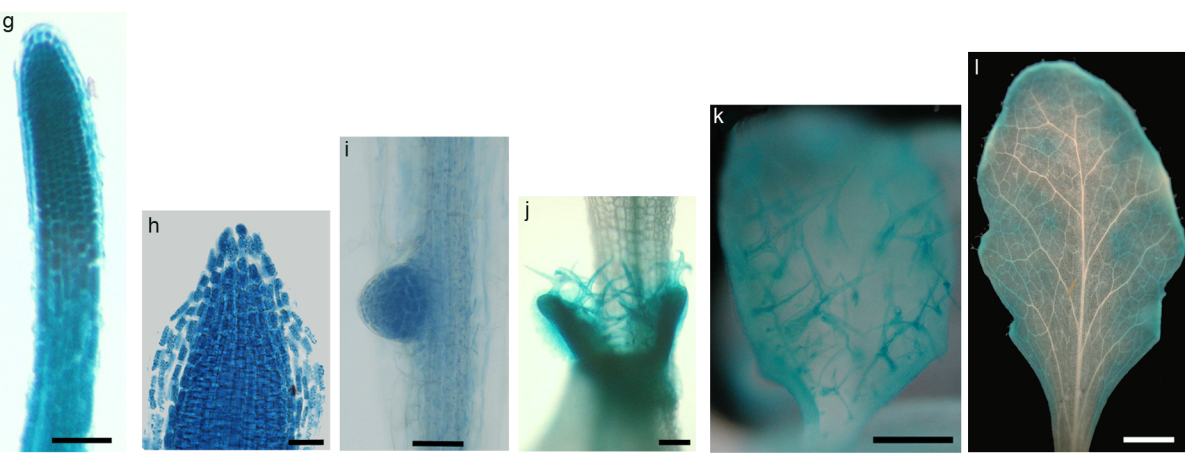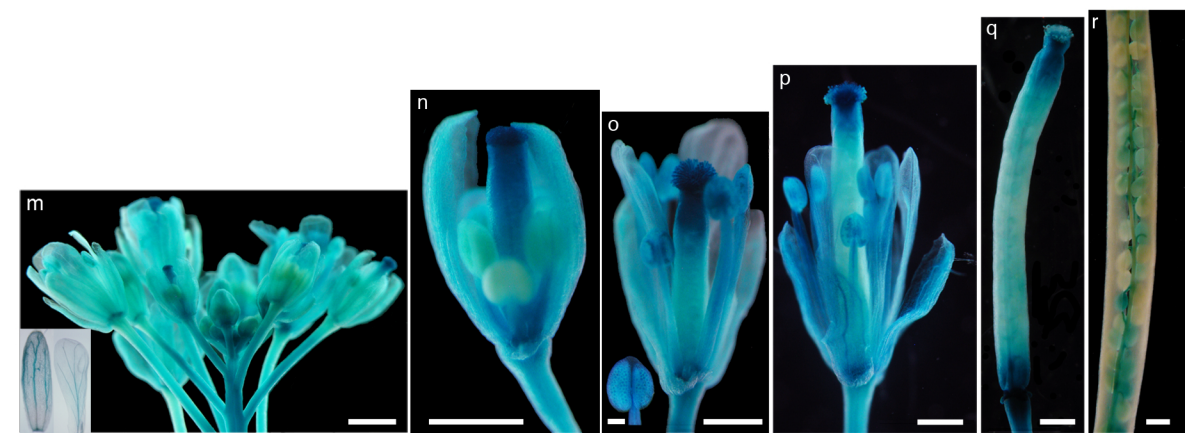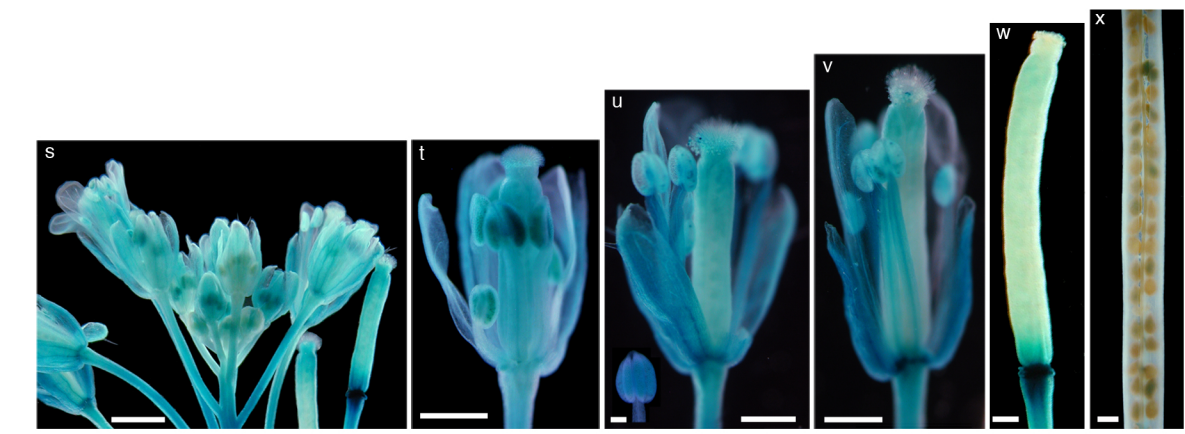

Supplement: TPJ-84-989-s001.pdf [file TPJ-84-989-s001.pdf]
